# Supplementary material
Source: PubMed Central journal article supplement (PMC6143116)
Supplement: jamaneurol-75-1098-s001.pdf [file jamaneurol-75-1098-s001.pdf]

## Supplementary Online Content

Pérez Vigil A, Fernández de la Cruz L, Brander G, et al. Association of Tourette syndrome and chronic tic disorders with objective indicators of educational attainment: a population-based sibling comparison study. Published online May 29, 2018. *JAMA Neurol*. doi: 10.1001/jamaneurol.2018.1194.

**eTable 1.** ICD codes used in the study.

**eTable 2.** Sensitivity analyses (1).

**eTable 3.** Sensitivity analyses (2).

This supplementary material has been provided by the authors to give readers additional information about their work.

**eTable 1. ICD codes used in the study.**

|                                                                                                       | <b>ICD-8</b>                               | <b>ICD-9</b>                                   | <b>ICD-10</b>                     |
|-------------------------------------------------------------------------------------------------------|--------------------------------------------|------------------------------------------------|-----------------------------------|
| Obsessive-compulsive disorder                                                                         | 300.3                                      | 300D                                           | F42                               |
| Attention-deficit/hyperactivity disorder                                                              |                                            | 314                                            | F90                               |
| Pervasive developmental disorders                                                                     |                                            | 299A, 299B, 299W, 299X                         | F84                               |
| Conduct disorders                                                                                     |                                            | 312                                            | F91                               |
| Learning disabilities                                                                                 |                                            | 315                                            | F81                               |
| Schizophrenia, schizotypal, and delusional disorders                                                  | 291, 295, 296.99, 297, 298, 299            | 291-292, 295, 296X, 297, 298, 299              | F20-F29, F32.3, x.5<br>in F10-F19 |
| Phobic, anxiety, and reaction to stress/adjustment disorders                                          | 300.00, 300.20                             | 300A, 300C                                     | F40-F41 and F43                   |
| Affective disorders                                                                                   | 296.1, 296.0, 296.2-8, 300.4               | 296A, 296B-296E, 296W, 300E, 311               | F30-F39 except 32.3               |
| Substance use disorders                                                                               | 303, 304                                   | 303, 304, 305A, 305X                           | F10-F19 except x.5                |
| Other disorders (comprising dissociative, somatoform, other neurotic disorders, and eating disorders) | 300.1, 300.5, 300.6, 300.7, 300.88, 300.99 | 300B, 300F, 300G, 300H, 300W, 300X, 307B, 307F | F44, F45, F48, F50                |

*Abbreviations:* ICD-8/9/10 International Classification of Diseases, eighth, ninth and tenth revisions

**eTable 2.** Sensitivity analyses (1).

Subcohort of individuals who had the time to complete every level of education assessed (cohort born between 1976 and 1992 for upper secondary school, between 1976 and 1990 for starting a university degree and between 1976 and 1988 for finishing a university degree). Odds ratios (OR) and corresponding 95% confidence intervals (CI) for educational attainment among individuals with Tourette's/chronic tic disorders (TD/CTD), compared with unaffected individuals from the general population and full siblings of affected individuals.

| Educational attainment level     | No. (%)                 |                            | OR (95% CI)             |                         |                                      |
|----------------------------------|-------------------------|----------------------------|-------------------------|-------------------------|--------------------------------------|
|                                  | Individuals with TD/CTD | Individuals without TD/CTD | Unadjusted model        | Adjusted <sup>a</sup>   | Full sibling comparison <sup>a</sup> |
|                                  | n=2,029                 | n=1,584,149                |                         |                         |                                      |
| Finishing upper secondary school | 944 (46.5)              | 1,249,973 (78.9)           | <b>0.23 (0.21-0.25)</b> | <b>0.25 (0.23-0.28)</b> | <b>0.39 (0.32-0.47)</b>              |
|                                  | n=1,535                 | n=1,363,675                |                         |                         |                                      |
| Starting a university degree     | 272 (17.7)              | 550,815 (40.4)             | <b>0.32 (0.28-0.36)</b> | <b>0.38 (0.33-0.43)</b> | <b>0.36 (0.27-0.48)</b>              |
|                                  | n=1,138                 | n=1,146,691                |                         |                         |                                      |
| Finishing a university degree    | 104 (9.1)               | 283,915 (24.8)             | <b>0.31 (0.25-0.37)</b> | <b>0.39 (0.32-0.48)</b> | <b>0.63 (0.44-0.91)</b>              |

<sup>a</sup>Adjusted by sex, year of birth, maternal age, paternal age and parity.

Abbreviations: CI confidence interval; TD/CTD Tourette's/chronic tic disorders; OR odds ratio.

Note: Statistically significant findings are highlighted in bold.

**eTable 3.** Sensitivity analyses (2).

Subcohort is restricted to individuals who were born between 1994-1998 to ensure full coverage of outpatient care from 2001. Odds ratios (OR) and corresponding 95% confidence intervals (CI) for educational attainment among individuals with Tourette's/chronic tic disorders (TD/CTD), compared with unaffected individuals from the general population and full siblings of affected individuals.

| Educational attainment level     | No. (%)                 |                            | OR (95% CI)             |                         |                                      |
|----------------------------------|-------------------------|----------------------------|-------------------------|-------------------------|--------------------------------------|
|                                  | Individuals with TD/CTD | Individuals without TD/CTD | Unadjusted model        | Adjusted <sup>a</sup>   | Full sibling comparison <sup>a</sup> |
| Compulsory education             | n=222 (0.2)             | n=9,3215 (99.8)            |                         |                         |                                      |
| Eligible for vocational program  | 167 (75.2)              | 85,535 (91.8)              | <b>0.27 (0.20-0.37)</b> | <b>0.30 (0.22-0.41)</b> | -                                    |
| Eligible for academic program    | 124 (55.9)              | 71,734 (77.0)              | <b>0.38 (0.29-0.49)</b> | <b>0.39 (0.30-0.51)</b> | -                                    |
| Post-compulsory education        | n=1,307 (0.3)           | n=424,887 (99.7)           |                         |                         |                                      |
| Finishing upper secondary school | 107 (8.2)               | 72,134 (17.0)              | <b>0.44 (0.39-0.53)</b> | <b>0.31 (0.24-0.40)</b> | -                                    |
| Starting a university degree     | -                       | 306 (0.07)                 | -                       | -                       | -                                    |
| Finishing a university degree    | -                       | -                          | -                       | -                       | -                                    |

<sup>a</sup>Adjusted by sex, year of birth, maternal age, paternal age and parity.

*Abbreviations:* CI confidence interval; TD/CTD Tourette's/chronic tic disorders; OR odds ratio; - insufficient data for calculations

*Note:* Statistically significant findings are highlighted in bold.
